# Supplementary material for: Immune cell profile of sentinel lymph nodes in patients with malignant melanoma – FOXP3+ cell density in cases with positive sentinel node status is associated with unfavorable clinical outcome
Source: PubMed Central journal article supplement (PMC3598232; doi:10.1186/1479-5876-11-43), 2013-02-18
Supplement: 1479-5876-11-43-S1.pdf [file 1479-5876-11-43-S1.pdf]

**Additional file 1. Proportion of patients with significant mean SLN immune cell density in groups with different patient and tumor characteristics**

|                               | Patient<br>no. | FOXP3<br>(>1900 cells/mm <sup>2</sup> ) |      | OX40<br>(>73 cells/mm <sup>2</sup> ) |      | CD123<br>(>480 cells/mm <sup>2</sup> ) |               | DC-LAMP<br>(>936 cells/mm <sup>2</sup> ) |      |
|-------------------------------|----------------|-----------------------------------------|------|--------------------------------------|------|----------------------------------------|---------------|------------------------------------------|------|
|                               |                | No. (%)                                 | P    | No. (%)                              | P    | No. (%)                                | P             | No. (%)                                  | P    |
| <b>All patients</b>           | <b>60</b>      | 33 (55)                                 |      | 34 (58)                              |      | 34 (58)                                |               | 30 (50)                                  |      |
| <b>Age</b>                    |                |                                         |      |                                      |      |                                        |               |                                          |      |
| <53 years                     | 30             | 15 (50)                                 |      | 18 (60)                              |      | 21 (72)                                |               | 13 (43)                                  |      |
| >53 years                     | 30             | 18 (60)                                 | n.s. | 16 (55)                              | n.s. | 13 (43)                                | <b>0.0238</b> | 17 (57)                                  | n.s. |
| <b>Sex</b>                    |                |                                         |      |                                      |      |                                        |               |                                          |      |
| Male                          | 27             | 17 (63)                                 |      | 18 (69)                              |      | 14 (52)                                |               | 15 (56)                                  |      |
| Female                        | 33             | 16 (48)                                 | n.s. | 16 (48)                              | n.s. | 20 (62)                                | n.s.          | 15 (45)                                  | n.s. |
| <b>Location</b>               |                |                                         |      |                                      |      |                                        |               |                                          |      |
| Extremities                   | 31             | 18 (58)                                 |      | 20 (65)                              |      | 16 (52)                                |               | 13 (42)                                  |      |
| Trunk                         | 29             | 15 (52)                                 | n.s. | 14 (50)                              | n.s. | 18 (64)                                | n.s.          | 17 (59)                                  | n.s. |
| <b>Type<sup>1</sup></b>       |                |                                         |      |                                      |      |                                        |               |                                          |      |
| SSM                           | 37             | 19 (51)                                 |      | 22 (61)                              |      | 21 (58)                                |               | 19 (51)                                  |      |
| NM                            | 19             | 10 (53)                                 | n.s. | 9 (47)                               | n.s. | 13 (68)                                | n.s.          | 11 (58)                                  | n.s. |
| <b>Thickness (mm)</b>         |                |                                         |      |                                      |      |                                        |               |                                          |      |
| 1.01-2.0                      | 29             | 14 (48)                                 |      | 13 (46)                              |      | 16 (57)                                |               | 15 (52)                                  |      |
| 2.01-4.0                      | 20             | 11 (55)                                 |      | 14 (70)                              |      | 13 (65)                                |               | 8 (40)                                   |      |
| >4.0                          | 11             | 8 (73)                                  | n.s. | 7 (64)                               | n.s. | 5 (45)                                 | n.s.          | 7 (64)                                   | n.s. |
| <b>Ulceration<sup>1</sup></b> |                |                                         |      |                                      |      |                                        |               |                                          |      |
| Absent                        | 37             | 19 (51)                                 |      | 18 (50)                              |      | 21 (58)                                |               | 20 (54)                                  |      |
| Present                       | 20             | 12 (60)                                 | n.s. | 13 (65)                              | n.s. | 12 (60)                                | n.s.          | 10 (50)                                  | n.s. |
| <b>SLN status</b>             |                |                                         |      |                                      |      |                                        |               |                                          |      |
| Negative                      | 35             | 18 (51)                                 |      | 19 (54)                              |      | 19 (56)                                |               | 16 (46)                                  |      |
| Positive                      | 25             | 15 (60)                                 | n.s. | 15 (62)                              | n.s. | 15 (60)                                | n.s.          | 14 (56)                                  | n.s. |

<sup>1</sup>ALM (n=4) cases, and 3 cases with ulceration unknown are not shown; n.s., not significant; SSM, superficial spreading melanoma; NM, nodular melanoma; ALM, acral lentiginous melanoma
